# Supplementary material
Source: PubMed Central journal article supplement (PMC7224326)
Supplement: NIHMS1578668-supplement-2.pdf [file NIHMS1578668-supplement-2.pdf]

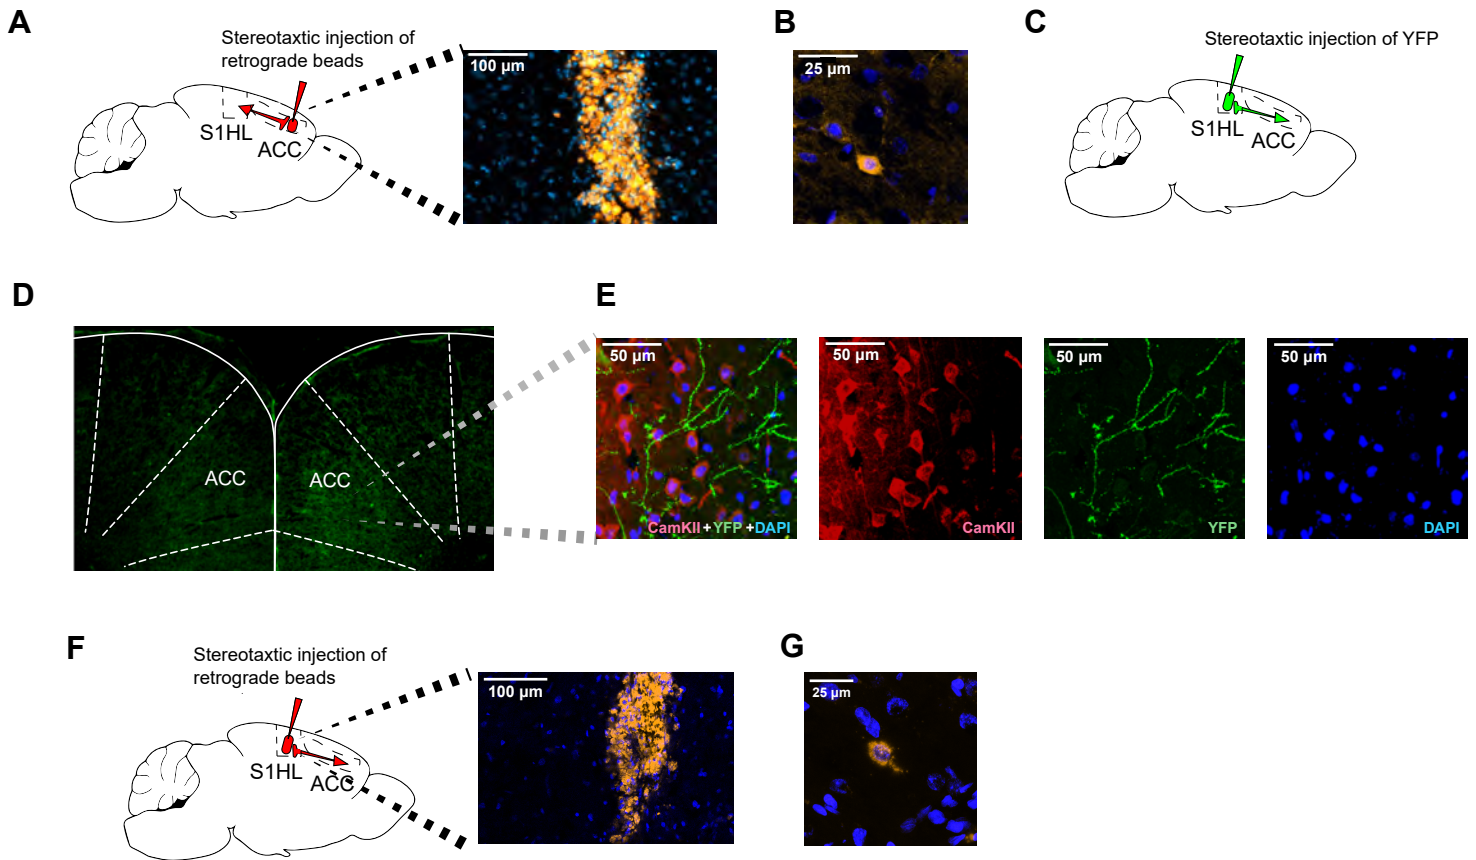

**Figure S1. Anatomic projection from the S1 to the ACC. Related to Figure 1. (A)** Schematic showing the retrograde tracer injected into the ACC. **(B)** Retrograde tracer expression in the hind limb region of S1. **(C)** Schematic showing the YFP injected into the S1. **(D)** Anterograde expression of YFP in the ACC. **(E)** Higher magnification view of the expression of YFP in the ACC. **(F)** Schematic showing the retrograde tracer injected into the S1. **(G)** Retrograde expression in the ACC.

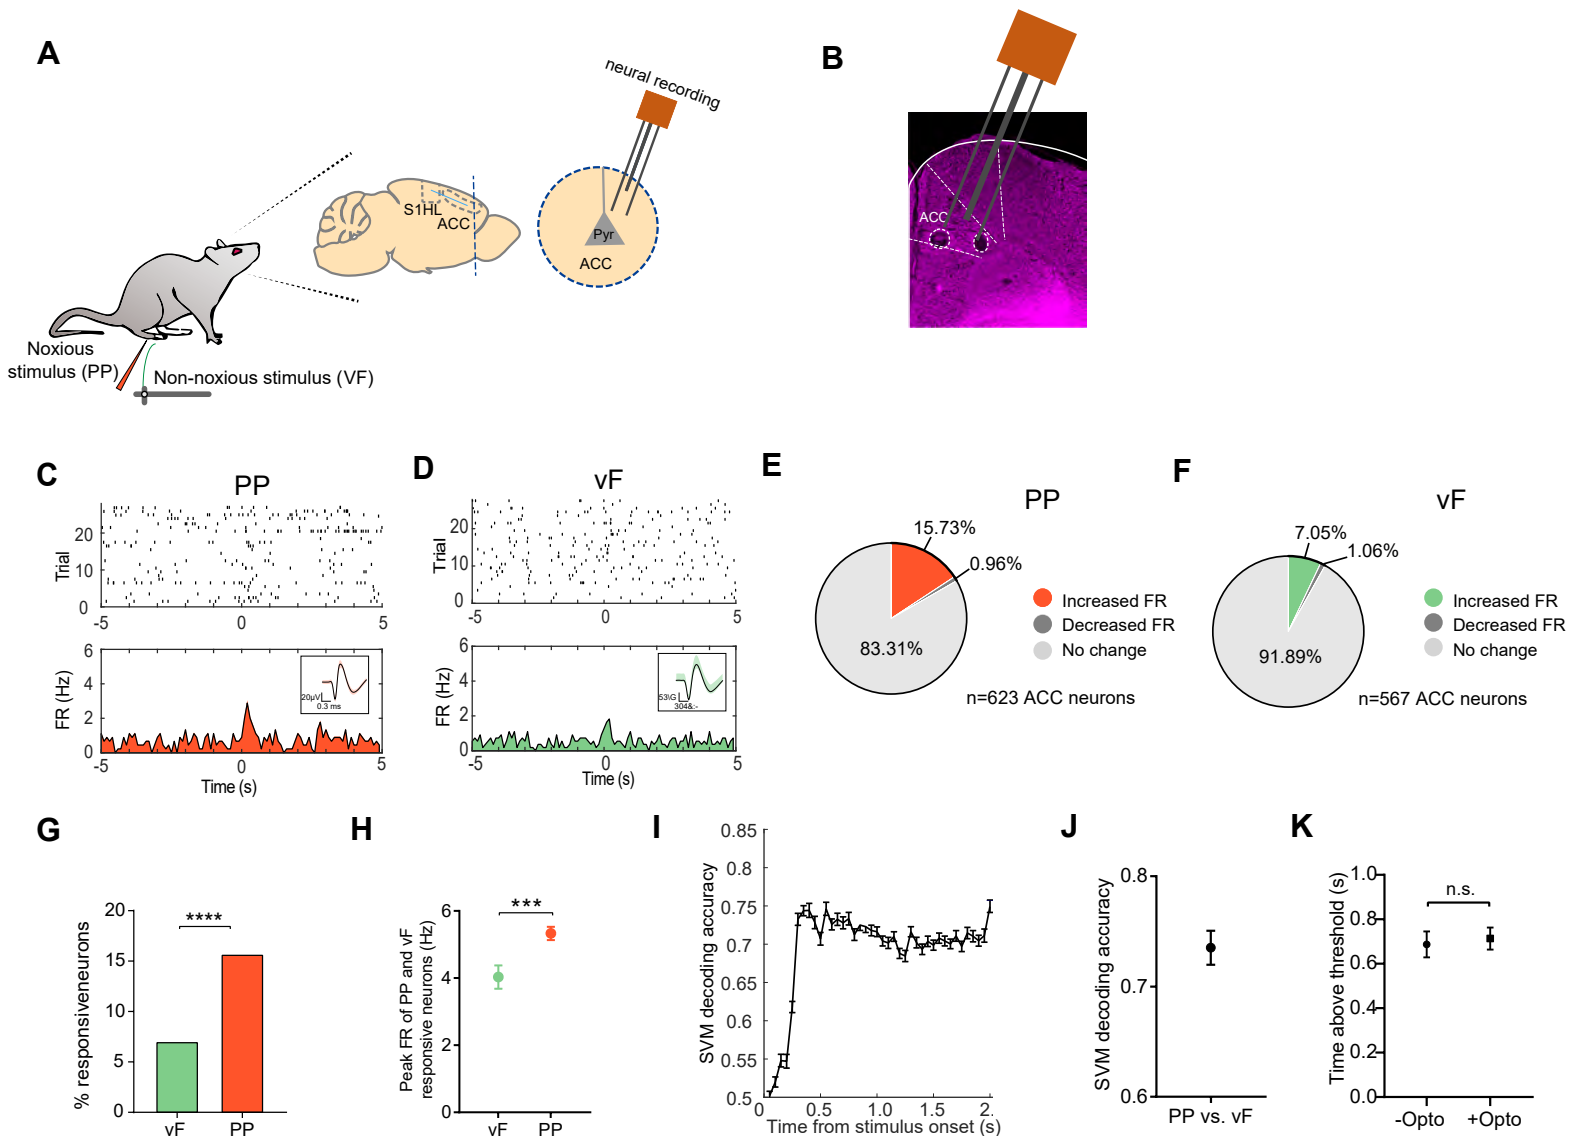

**Figure S2. ACC nociceptive responses in freely behaving rodents. Related to Figure 1.** (A) Schematic showing electrode implants in the ACC. (B) Histology showing electrode locations in the ACC. (C) Raster plots and peri-stimulus time histograms (PSTHs) of a representative ACC neuron. Time 0 indicates the onset of noxious pin prick (PP) stimulation. FR: firing rates. Inset shows representative single cell recordings. (D) Raster plots and PSTHs of a representative ACC neuron. Time 0 indicates the onset of non-noxious von Frey filament (vF) stimulation. (E) About 15.73% of recorded ACC neurons ( $n = 623$  from 6 rats) responded to PP. See **Methods** for criteria of stimulus-responsive neurons. (F) About 7.05% of recorded ACC neurons ( $n = 567$  from 6 rats) responded to vF. (G) The difference in the proportion of neurons that increased their firing rates in response to vF and PP was statistically significant.  $p < 0.0001$ , Fisher's exact test. (H) Among neurons that responded to both stimuli, PP induced higher firing rates than vF. Data represented as mean  $\pm$  SEM.  $n_1 = 40$  for vF,  $n_2 = 98$  for PP;  $p = 0.0009$ , Wilcoxon paired signed rank test. See **Methods** for calculations of stimulus-evoked firing rates. (I) A representative session of SVM-based population-decoding analysis to distinguish between noxious and non-noxious stimulations. Time zero denotes the onset of stimulus

(PP or vF). The black curve denotes the decoding accuracy ( $n_1 = 25$  trials for PP,  $n_2 = 25$  trials for vF;  $C = 8$  ACC neurons) derived from the data with true labels; the error bar denotes the SEM from 50 Monte Carlo simulations based on 2-fold cross-validation. See **Methods** for details. **(J)** SVM-based population-decoding analysis, based on ACC neuronal activity, demonstrated the ability to distinguish between noxious and non-noxious stimulation.  $n = 40$  sessions from 5 rats. **(K)** There is no significant difference in response time among neurons in the ACC with no activation ( $n = 98$ ) and with optogenetic activation ( $n = 131$ ) of S1 inputs to the ACC.  $p = 0.7075$ , Mann-Whitney U test.

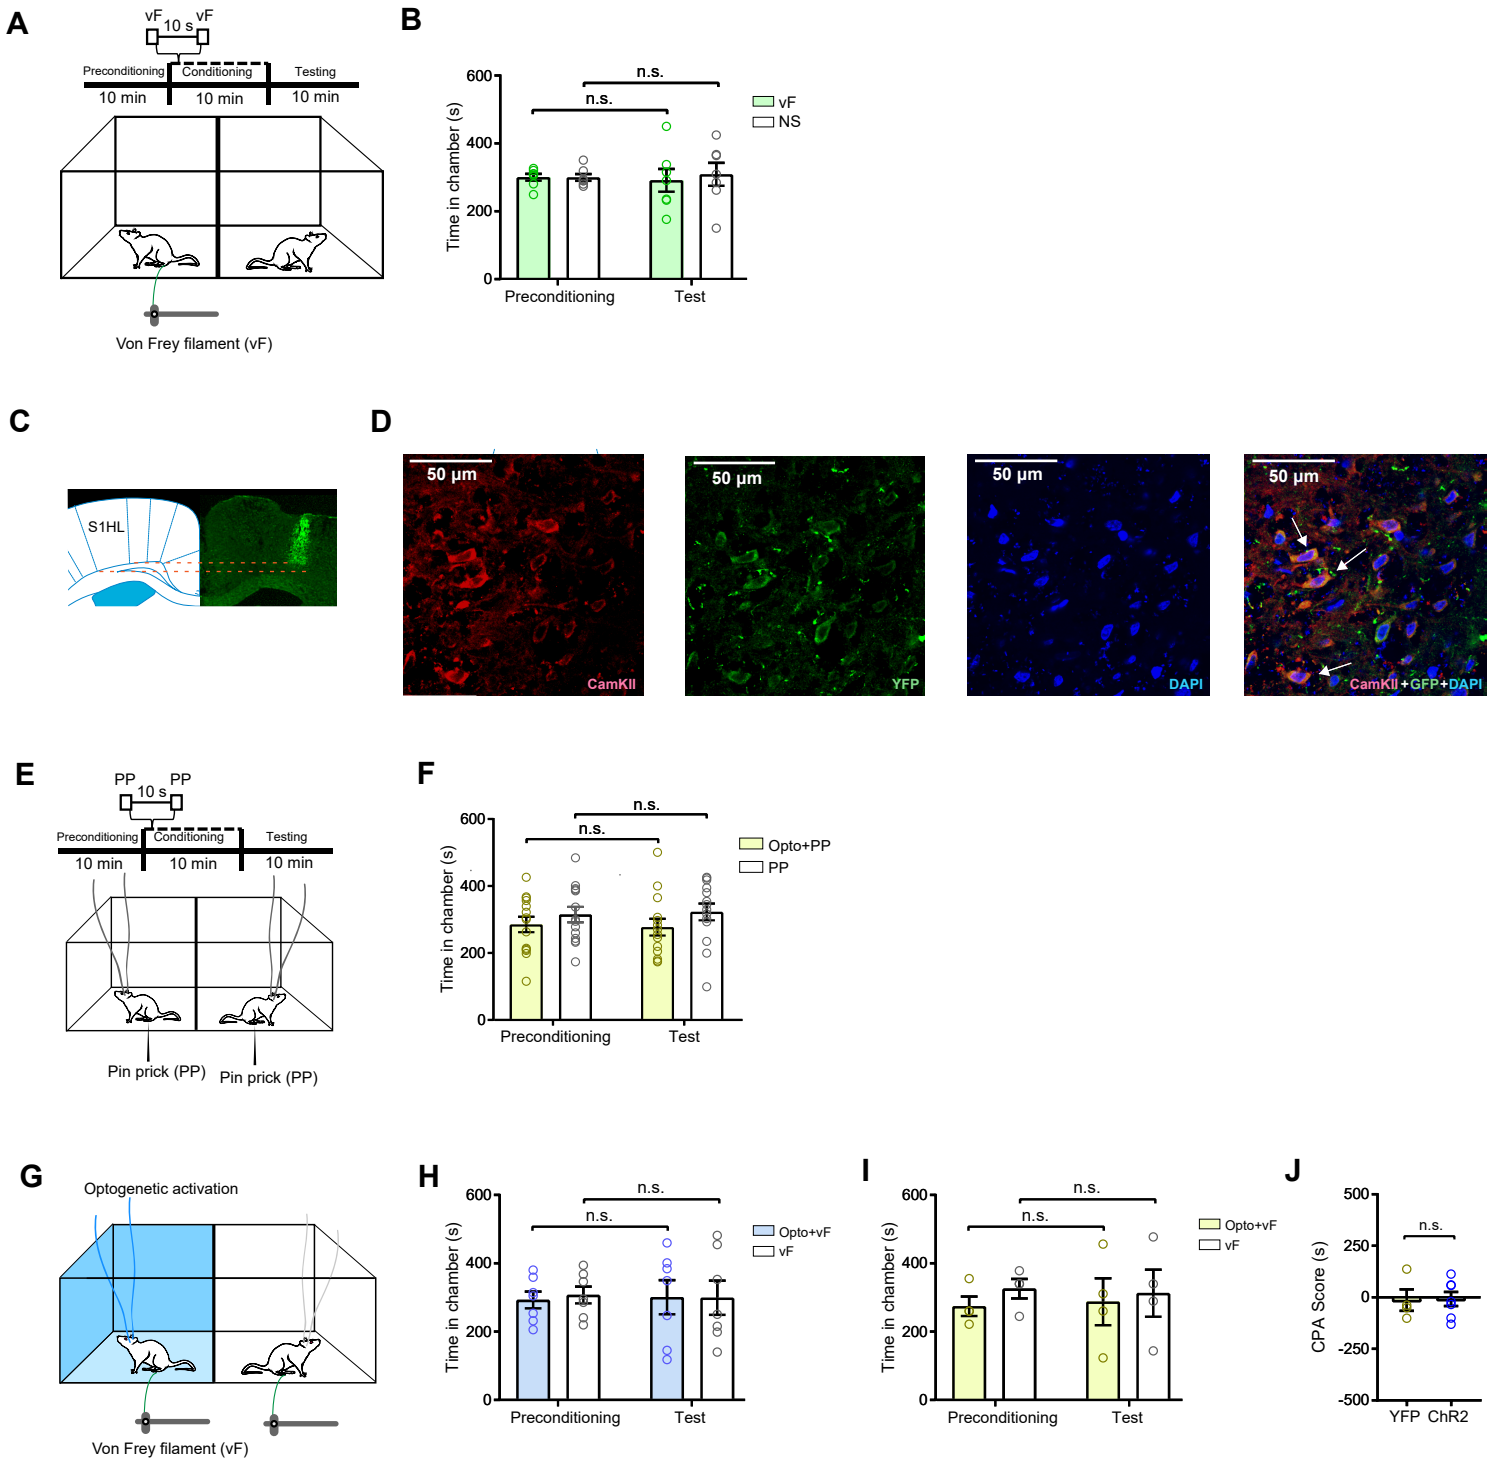

**Figure S3. Rats do not demonstrate aversive response in control conditions. Related to Figure 2. (A)** Schematic of the conditioned place preference (CPA) assay, when rats are presented with vF stimulation to hind paws. **(B)** Rats displayed no aversive response to non-noxious mechanical stimulus. One of the chambers was paired with vF, the other chamber was not paired with a noxious stimulus (NS).  $n = 7$ ;  $p = 0.8117$ , paired Student's  $t$  test. **(C)** Low magnification (10x) view of histologic expression of channelrhodopsin (YFP-ChR2) in the S1 hind limb region after injection. **(D)** Higher magnification

(63x) view of the expression of YFP-ChR2 in pyramidal neurons of the S1 demonstrated the co-staining of glutamatergic neuronal marker CaMKII with YFP. From left to right: CaMKII staining; ChR2-eYFP staining; DAPI staining and merged images. **(E)** Schematic of the conditioned place preference (CPA) assay. One of the chambers was paired with light treatment and PP; the other chamber was paired with PP alone. **(F)** Control rats that expressed YFP alone did not demonstrate preference for either chamber, when presented with PP.  $n = 14$ ;  $p = 0.8087$ , paired Student's t test. **(G)** Schematic of the conditioned place preference (CPA) assay, when rats are presented with vF to hind paws. One chamber was paired with S1→ACC activation and the other chamber was not. **(H)** Rats did not avoid the chamber associated with S1→ACC activation, when presented with vF.  $n = 7$ ;  $p = 0.8232$ , paired Student's t test. **(I)** YFP control rats did not avoid the chamber associated with S1→ACC activation, when presented with vF.  $n = 4$ ;  $p = 0.8154$ , paired Student's t test. **(J)** CPA score for S1→ACC activation in the presence of vF stimulus.

**A**

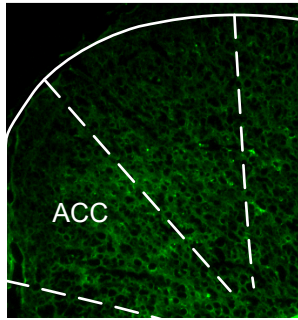

**B**

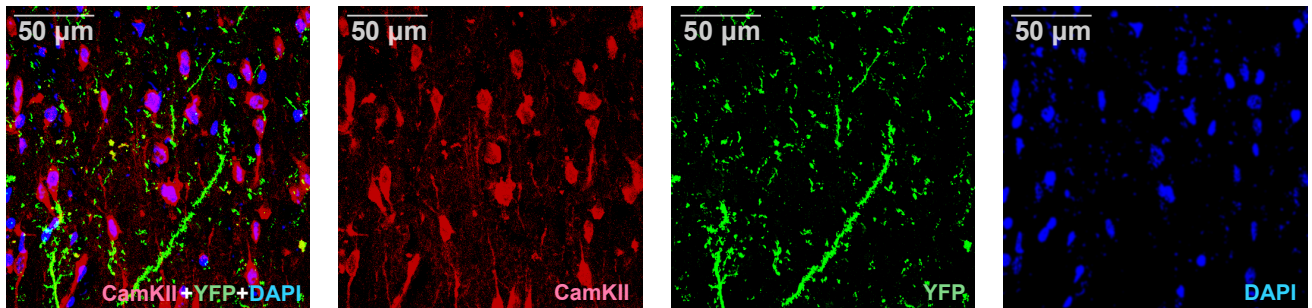

**Figure S4. Expression of Halorhodopsin (NpHR) in the ACC. Related to Figure 2.** (A) Expression of Halorhodopsin (NpHR) in the ACC. (B) Higher magnification view of the expression of HR in the ACC.

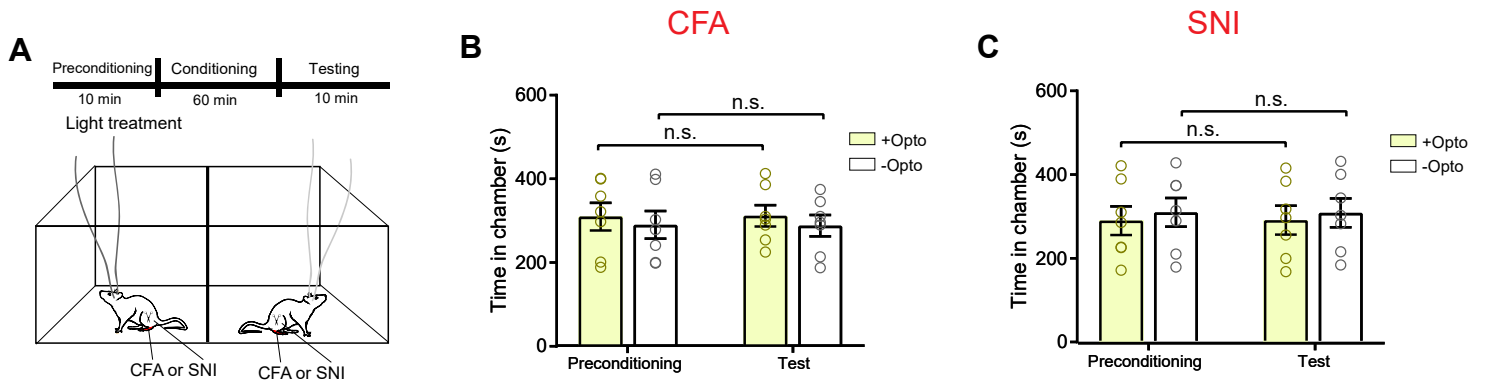

**Figure S5. YFP control rats do not demonstrate avoidance of the chamber associated with light treatment in the chronic pain condition. Related to Figures 4 and 5. (A)** Schematic of the conditioned place preference (CPA) assay in chronic pain rats. One of the chambers was paired with light treatment; the other was not. No peripheral stimulus was given. **(B)** CFA-treated rats with YFP (control) expression did not demonstrate any chamber preference.  $n = 7$ ;  $p = 0.9502$ , paired Student's  $t$  test. **(C)** SNI-treated rats with YFP control did not demonstrate any chamber preference.  $n = 7$ ;  $p = 0.9723$ , paired Student's  $t$  test.
